1 **Irradiation of UVC LED at 277 nm inactivates coronaviruses by photodegradation of spike protein.**

2

3 **Authors:** Qunxiang Ong<sup>1\*</sup>, J. W. Ronnie Teo<sup>2</sup>, Joshua Dela Cruz<sup>1</sup>, Elijah Wee<sup>1</sup>, Winson Wee<sup>1</sup>, Weiping

4 Han<sup>1\*</sup>

5 **Affiliations:**

6 <sup>1</sup> Institute of Molecular and Cell Biology, Agency for Science, Technology and Research (A\*STAR), 11

7 Biopolis Way, #02-02, Helios, Singapore, 138667, Singapore.

8 <sup>2</sup> Singapore Institute of Manufacturing Technology (SIMTech), Agency for Science, Technology and

9 Research (A\*STAR), 2 Fusionopolis Way, #08-04, Innovis, Singapore 138634, Singapore.

10 *\*Corresponding author. Email: ongqx@imcb.a-star.edu.sg, wh10@cornell.edu*

11

12

13

14

15 **SUMMARY:**

16 To interrupt SARS-CoV-2 transmission chains, Ultraviolet-C (UVC) irradiation has emerged as a potential  
17 disinfection tool to aid in blocking the spread of coronaviruses. While conventional 254-nm UVC mercury  
18 lamps have been used for disinfection purposes, other UVC wavelengths have emerged as attractive  
19 alternatives but a direct comparison of these tools is lacking with the inherent mechanistic properties  
20 unclear. Our results using human coronaviruses, hCoV-229E and hCoV-OC43, have indicated that 277-nm  
21 UVC LED is most effective in viral inactivation, followed by 222-nm far UVC and 254-nm UVC mercury  
22 lamp. While UVC mercury lamp is more effective in degrading viral genomic content compared to 277-nm  
23 UVC LED, the latter results in a pronounced photo-degradation of spike proteins which potentially  
24 contributed to the higher efficacy of coronavirus inactivation. Hence, inactivation of coronaviruses by 277-  
25 nm UVC LED irradiation constitutes a more promising method for disinfection.

26

## 27 INTRODUCTION

28           The novel coronavirus SARS-CoV-2 has precipitated into the COVID-19 pandemic, and at the  
29 time of writing, resulted in more than 171 million infections and 3 million deaths. The actual numbers  
30 should be much higher than reported, given the high incidence of asymptomatic cases escaping the  
31 capture by traditional diagnostic methods. Vaccination, masking, rigorous testing and thorough public  
32 disinfection strategies become vital prongs in combating virus spread within communities. Amongst the  
33 latter, ultraviolet irradiation presents as an attractive strategy, given its use being well established in  
34 inactivating viruses and killing other microbes(Lin et al., 2020; Raeiszadeh and Adeli, 2020).

35 Consequently, UVC mercury lamps have been increasingly deployed in hospital settings.

36 UVC has been well known to possess germicidal properties and inactivate pathogenic microbes by  
37 damaging nucleic acids and proteins, thereby eliminating their ability to reproduce(Rauth, 1965; Sehgal,  
38 1973; Setlow and Carrier, 1966; Werbin et al., 1966). The mechanism at which UV inactivates microbes  
39 depends highly on the specific wavelengths. 277nm UVC LEDs (Beck et al., 2017; Kim and Kang, 2018;  
40 Nguyen et al., 2019; Nunayon et al., 2020) and far UVC sources(Welch et al., 2018a, 2018b) have  
41 recently emerged as attractive alternatives to UVC mercury lamps. The former does not require mercury,  
42 which is banned by the Minamata Convention, has very short turn-on time, and is generally more reliable  
43 and has a longer lifetime(Song et al., 2016). The far UVC, on the other hand, is shown to be effective in  
44 inactivation of bacteria and human coronaviruses, and potentially poses less safety concerns for  
45 deployment(Barnard et al., 2020; Buonanno et al., 2020).

46 Numerous studies have studied the sensitivity of different microbes to UVC wavelengths, including human  
47 coronaviruses (Buonanno et al., 2020; Gerchman et al., 2020)and SARS-CoV-2(Inagaki et al., 2020;  
48 Kitagawa et al., 2020; Storm et al., 2020). However, no study to date has performed a direct comparative  
49 study on the efficacy of different UVC wavelengths on inactivation of coronaviruses. In addition, mechanistic  
50 insight into how different UVC wavelengths inactivate coronaviruses is severely lacking, and greater  
51 understanding in this area would facilitate their deployment in future pandemics. Here, we utilized human  
52 coronaviruses, HCoV-229E and OC43, for efficacy studies where 277nm UVC LED consistently

53 outperforms the other UVC wavelengths in inactivating coronaviruses. Mechanistic studies suggest that  
54 this is achieved via a combination of photo-degradation of spike proteins and RNA molecules.  
55

## 56 RESULTS

### 57 Utilizing human coronaviruses for UVC-induced inactivation studies

58 Coronaviruses are split into the four genera: Alphacoronavirus, Betacoronavirus, Gammacoronavirus and  
59 Deltacoronavirus (Fehr and Perlman, 2015; Woo et al., 2010). Among the different genera,  
60 alphacoronaviruses and betacoronaviruses have been known to infect mammals, and pose as a significant  
61 risk to the human population. The betacoronaviruses, MERS-CoV, SARS-CoV and SARS-CoV-2, may  
62 produce severe symptoms in patients while hCoV-OC43 and hCoV-229E cause about 15% of common  
63 colds (**Fig. 1A**). In terms of genomic organization, coronaviruses are the largest enveloped RNA viruses  
64 with positive single-stranded RNA molecules from 27 to 32 kilobases. The genome comprises of the  
65 replicase gene that encodes for the non-structural proteins of the genomes at about 20 kilobases, while  
66 similar structural proteins in the form of spike, envelop, membrane and nucleocapsid proteins are  
67 interspersed at the 3' end of the genome (**Fig. 1B**).

68 It has been established that RNA chains are directly disrupted by UVC by formation of pyrimidine  
69 dimers (Merriam and Gordon, 1967). The dimerization reaction occurs from adjacent pyrimidine bases in  
70 the form of uracil and cytosine (Beukers et al., 2010; Brown and Johns, 1968). We analyzed the genomic  
71 content of the coronaviruses based on these sequences as indicated their accession numbers from the  
72 NCBI Nucleotide: hCoV-OC43 (MW532119.1), hCoV-229e (KU291448.1) and SARS-CoV-2  
73 (MW403500.1). We found that their overall base composition (**Fig. 1C**) and adjacent base arrangements  
74 (**Fig. 1D**) to be similar. We therefore hypothesize that the kinetics of UVC inactivation of hCoV-OC43 and  
75 hCoV-229E to be roughly similar.

### 76 Inactivation of human coronaviruses after exposure to different UVC wavelengths

77 To examine the inactivation efficacy of UVC on hCoV-OC43 and hCoV-229E, virus was placed on plastic  
78 petri dishes and expose to various UVC wavelengths of 73  $\mu\text{W}/\text{cm}^2$  for different timings ranging from 30 to  
79 300 seconds (**Fig. S1-S2**). The reduction in infectivity of hCoV-OC43 (**Fig. 2A, Table S1**) and hCoV-229E  
80 (**Fig. 2B, Table S2**) can be observed after exposure to different UVC irradiation. The 277-nm UVC LED  
81 was most effective in carrying out the inactivation and achieved 3-log inactivation at 22  $\text{mJ}/\text{cm}^2$  for both  
82 human coronavirus strains, whereas 254-nm UV lamp achieved only 2-log inactivation for hCoV-OC43 and

83 1-log inactivation for hCoV-229E with the same dosage. Two-way ANOVA analyses of both sets of data  
84 reveal significant differences (**Table S1-2**) between the three UVC wavelengths in carrying out coronavirus  
85 inactivation ( $p=0.0001$  and  $p<0.0001$  for hCoV-OC43 and hCoV-229E respectively).

86 We next investigated the integration of hCoV-OC43 in human lung host cells after exposure to 300 seconds  
87 of UVC sources. **Fig. 2C** shows the representative images of human lung cells HCT-8 with hCoV-OC43  
88 illuminated at different UVC wavelengths. We assessed the human cell lines for expression of the viral  
89 spike protein and found that 277-nm UVC outperforms the other UVC wavelengths in inactivation of  
90 coronaviruses.

#### 91 Examining rates of nucleotide degradation under different UVC wavelengths.

92 To understand if the inactivation efficacy comes from RNA damage, we performed quantitative RT-PCR to  
93 examine the copy number of hCoV-OC43 after UVC irradiation. We observed that the copy number of  
94 hCoV-OC43 to be unperturbed after 300 seconds of 222-nm far UVC irradiation, while 254-nm UV lamp  
95 exerted the largest decrease in copy number followed by 277-nm UVC LED (**Fig. 3A**).

#### 96 Photodegradation of hCoV-OC43 spike protein under 277-nm UVC LED

97 We next hypothesized that molecular components other than nucleic acids could be implicated, and the  
98 spike protein is an especially attractive target to pursue given that it facilitates viral transmission by binding  
99 to the host receptors(Shang et al., 2020). To this end, we subjected hCoV-OC43 to different duration of  
100 254-nm and 277-nm UVC irradiation, and observed through western blot that the spike protein is degraded  
101 under 277-nm UVC LED and not under 254-nm UVC lamp. Silver staining of the viral lysate indicates the  
102 overall amount of protein loaded in each lane (**Fig. 3B**). To further confirm that spike protein is indeed  
103 degraded by 277-nm UVC LED, we performed UVC illumination on purified hCoV-OC43 spike proteins in  
104 vitro. Silver staining as depicted in **Fig. 3C** shows that hCoV-OC43 spike protein presents at a lower  
105 intensity under 277-nm UVC LED and not under 254-nm UV lamp. This is further corroborated by  
106 absorbance spectroscopy in **Fig. 3C** which demonstrates a shift in absorbance upon 277-nm UVC LED  
107 illumination but not 254-nm UV lamp.

#### 108 Photodegradation of SARS-CoV-2 spike protein under 277-nm UVC LED

109 First, we exposed SARS-CoV-2 spike protein S1 subunit to varied durations of 254-nm UVC lamp and 277-  
110 nm UVC LED and observed the reduction of the full-length spike protein band under 277-nm UVC LED and  
111 not under 254-nm UVC LED. This happens on both glycosylated and non-glycosylated forms of the spike  
112 protein (**Fig. 4A**). Absorbance spectroscopy (**Fig. 4B**) analysis showed the UV absorbance profile of 254-  
113 nm lit proteins to be relatively unchanged while there is an increase of absorbance profile in the 250-300  
114 nm region for 277-nm lit proteins. Western blot (**Fig. 4C**) analysis further revealed a reduction in the SARS-  
115 CoV-2 spike S1 proteins under low loading of protein samples, but under higher loadings, aggregates of  
116 spike protein in the form of dimers and trimers could be seen in a dose-dependent manner.

117 In the search for potential mechanisms that drive the absorption of 277-nm wavelengths and degradation /  
118 aggregation of the proteins, we studied the structure of the SARS-CoV-2 S glycoprotein (PDB: 6VXX) (Walls  
119 et al., 2020) and looked for aromatic amino acids in proximity to disulfide bonds as possible active regions  
120 upon 277-nm UVC irradiation. In particular, tryptophan has high molar absorptivity at the 280-nm  
121 wavelength and has been known to mediate energy transfer and neighboring disulfide bond breakage  
122 (Beaven and Holiday, 1952; Chan et al., 2006; Kerwin and Remmele, 2007; Wu et al., 2008). We identified  
123 the Trp 436 as a key antenna of 277-nm absorption, and conducted studies on W436R receptor binding  
124 domain (RBD) mutant alongside wild type, F377L and Y453F mutants, that are in close proximity but  
125 unlinked to the W436-C336-C361 transfer chain (**Fig. 4D**). We illuminated the RBD samples with 0, 2, 5,  
126 10 minutes of 277-nm UVC LED and studied the rate of oligomerization for each sample by probing with  
127 SARS-CoV-2 Spike antibody (**Fig. 4E**). It is observed that W436R mutant has a lower rate of aggregation  
128 compared to the other species and this is quantified by comparing the intensity of the monomer fraction (at  
129 35kDa) with respect to the rest of the lane for samples illuminated with 5 minutes of 277-nm UVC LED (**Fig.**  
130 **4F**). Absorbance spectroscopy further verified that after 10 minutes of UVC LED illumination, the W436R  
131 mutant did not exhibit as significant changes in absorbance compared to the wild-type and Y453F mutant.

132

133

134 **DISCUSSION**

135 In this study, we focused on human coronaviruses hCoV-OC43 and hCoV-229E, which belong to the genus  
136 beta-coronavirus and alpha-coronavirus respectively. In particular, hCoV-OC43 could be considered as a  
137 surrogate for SARS-CoV-2 and the conclusions drawn here on UVC efficacy can thus be extrapolated to  
138 SARS-CoV-2. On the other hand, hCoV-229E resembles the viruses that causes the common cold. The  
139 viral efficacy tests performed here not only targeted the current COVID-19 pandemic, but also applies to  
140 future coronaviral pandemics in general.

141 While many studies have individually tested the 222-nm far UVC lamp, 254-nm UVC lamp and broad ranges  
142 of UVC LEDs for their efficacy towards viruses, this is the first study to report the mechanisms through  
143 which viral inactivation occurs. In summary, we find that 277-nm UVC LED outperforms the other UVC  
144 wavelengths in inactivation of human coronaviruses, and this could be aided by the contribution from spike  
145 protein degradation with absorption of UV wavelengths at Trp 436. We also find that 222-nm UVC LED  
146 does not affect the genomic material of beta-coronavirus, an observation that is congruent with a previous  
147 report (Kitagawa et al, 2020).

148 It has been widely believed that the efficacy of UV germicidal irradiation (UVGI) is dependent largely on the  
149 absorption by the target nucleic acids. While the mechanism holds significant merit, it is important to  
150 examine the other molecular mechanisms at which UV tools could exert their germicidal properties. It is  
151 thus important to consider the viral components individually as we characterize the multitude of UVGI  
152 solutions available to combat the current and future pandemics.

153 **LIMITATIONS OF STUDY**

154 Due to the lack of access to BSL-3 facilities, we were unable to perform the viral infectivity tests on  
155 SARS-CoV-2 or the relevant variants. However, this limitation is mitigated by our studies on the beta  
156 coronavirus hCoV-OC43, which provides a close approximation towards SARS-CoV-2 with the relevant  
157 structures of the spike proteins being relatively similar.



158 **Figures**

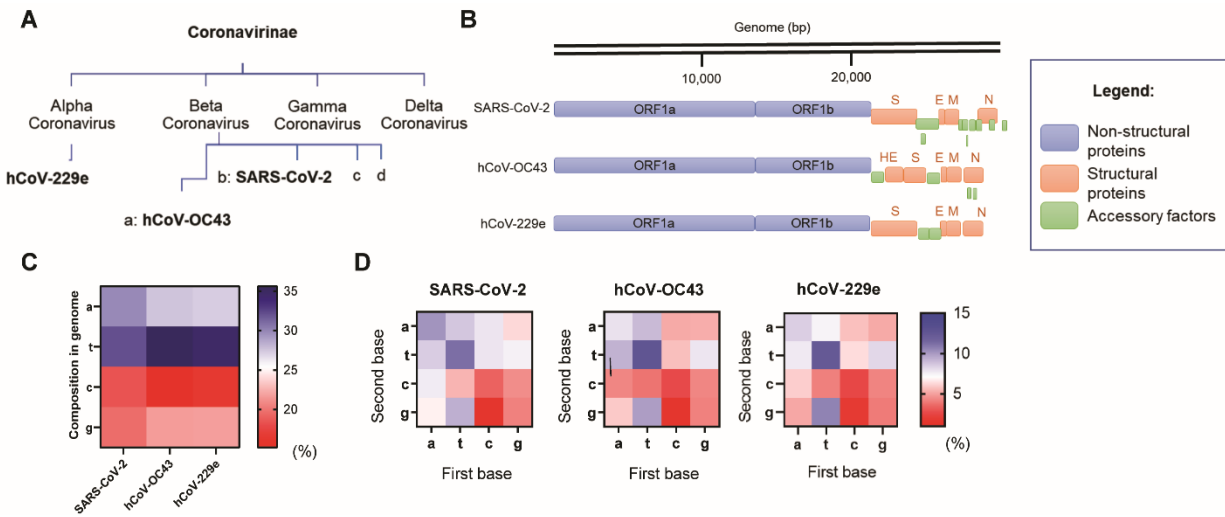

159

160 **Figure 1. Utilizing human coronaviruses for UVC-induced inactivation studies**

161 (a) The different genera of the coronavirus family. Alpha and beta-coronaviruses with the various  
 162 highlighted viruses, hCoV-229e, hCoV-OC43 and SARS-CoV-2.

163 (b) Genome organizations of SARS-CoV-2, hCoV-OC43 and hCoV-229e.

164 (c) Overall base composition of SARS-CoV-2, hCoV-OC43 and hCoV-229e.

165 (d) Adjacent base composition of SARS-CoV-2, hCoV-OC43 and hCoV-229e.

166

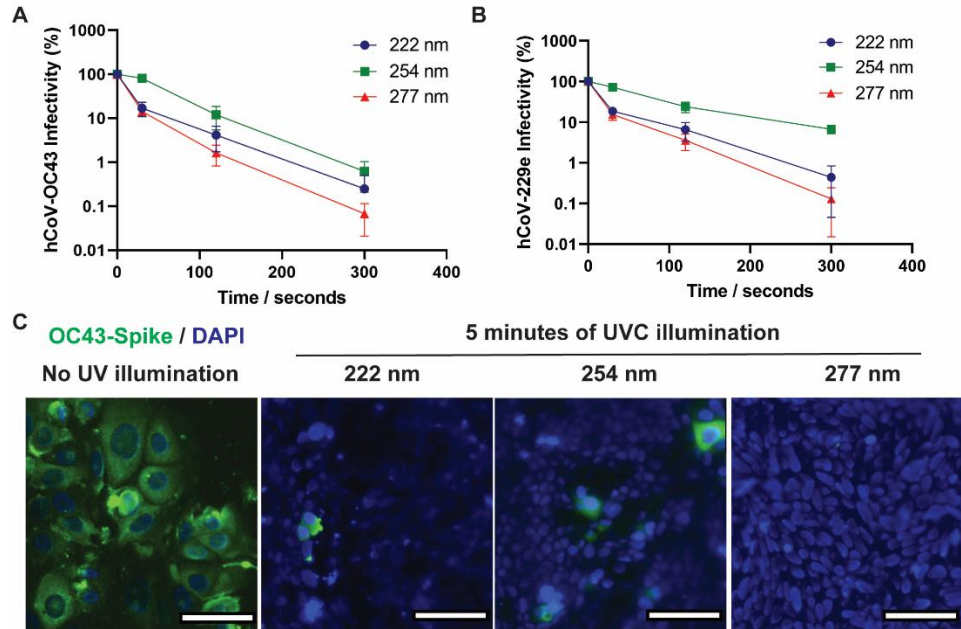

167

168 **Figure 2. Inactivation of human coronaviruses after exposure to different UVC wavelengths**

169 (a) HCoV-OC43 infectivity as a function of the duration of different UVC sources at  $73 \mu\text{W}/\text{cm}^2$ .  
170 Infectivity is defined as a function of  $\text{PFU}_{\text{UV}}/\text{PFU}_{\text{NoUV}}$ . Values are reported as mean  $\pm$  SD from  $n$   
171 = 3 experiments.

172 (b) HCoV-229e infectivity as a function of the duration of different UVC sources at  $73 \mu\text{W}/\text{cm}^2$ .  
173 Infectivity is defined as a function of  $\text{PFU}_{\text{UV}}/\text{PFU}_{\text{NoUV}}$ . Values are reported as mean  $\pm$  SD from  $n=3$   
174 experiments.

175 (c) Infection of human lung cell line, HCT-8 from irradiated and untreated hCoV-OC43. Green  
176 fluorescence indicates infected cells while blue fluorescence indicates DAPI stains of nuclei.  
177 Images were acquired with a 40x objective, with the scale bars at  $50 \mu\text{m}$ .

178

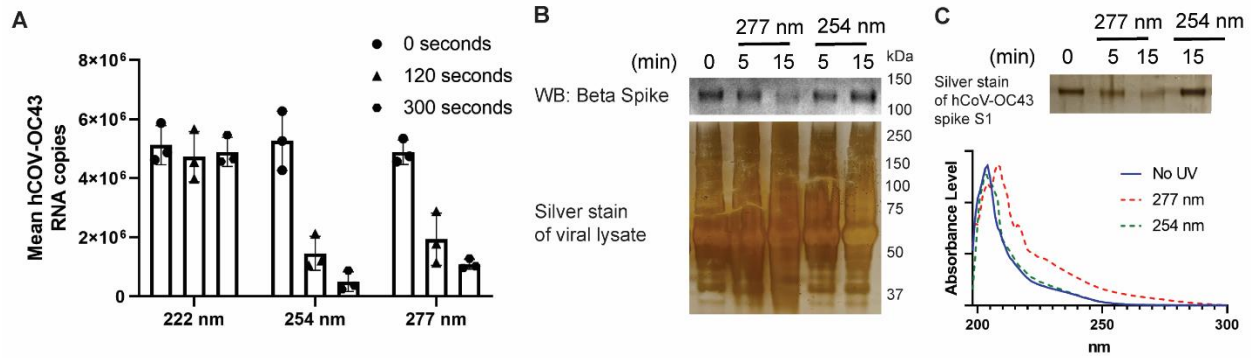

179

180 **Figure 3. 277nm UVC LED's higher efficacy at inactivation of coronavirus is not due to UV-induced**  
 181 **genomic damage and could be due to spike protein degradation.**

182 (a) Quantitative RT-PCR reveals that the copy number of hCoV-OC43 did not change due to 222-nm  
 183 illumination, and decrease the fastest due to 254-nm UVC lamp. Values are reported as mean +/-  
 184 SD from n=3 experiments.

185 (b) Beta spike glycoprotein of hCoV-OC43 is found to diminish in intensity upon 15 minutes of 277-nm  
 186 UVC LED illumination but not under 254-nm UVC lamp. Silver stain of viral lysate is provided to  
 187 show the total loading on each lane.

188 (c) Purified hCoV-OC43 spike S1 proteins is found to diminish in intensity upon 15 minutes of 277-nm  
 189 UVC LED illumination but not under 254-nm UVC lamp. Changes in absorbance spectra of hCoV-  
 190 OC43 spike S1 observed after 15 minutes of 277-nm UVC LED irradiation but not 254-nm UVC  
 191 lamp.

192

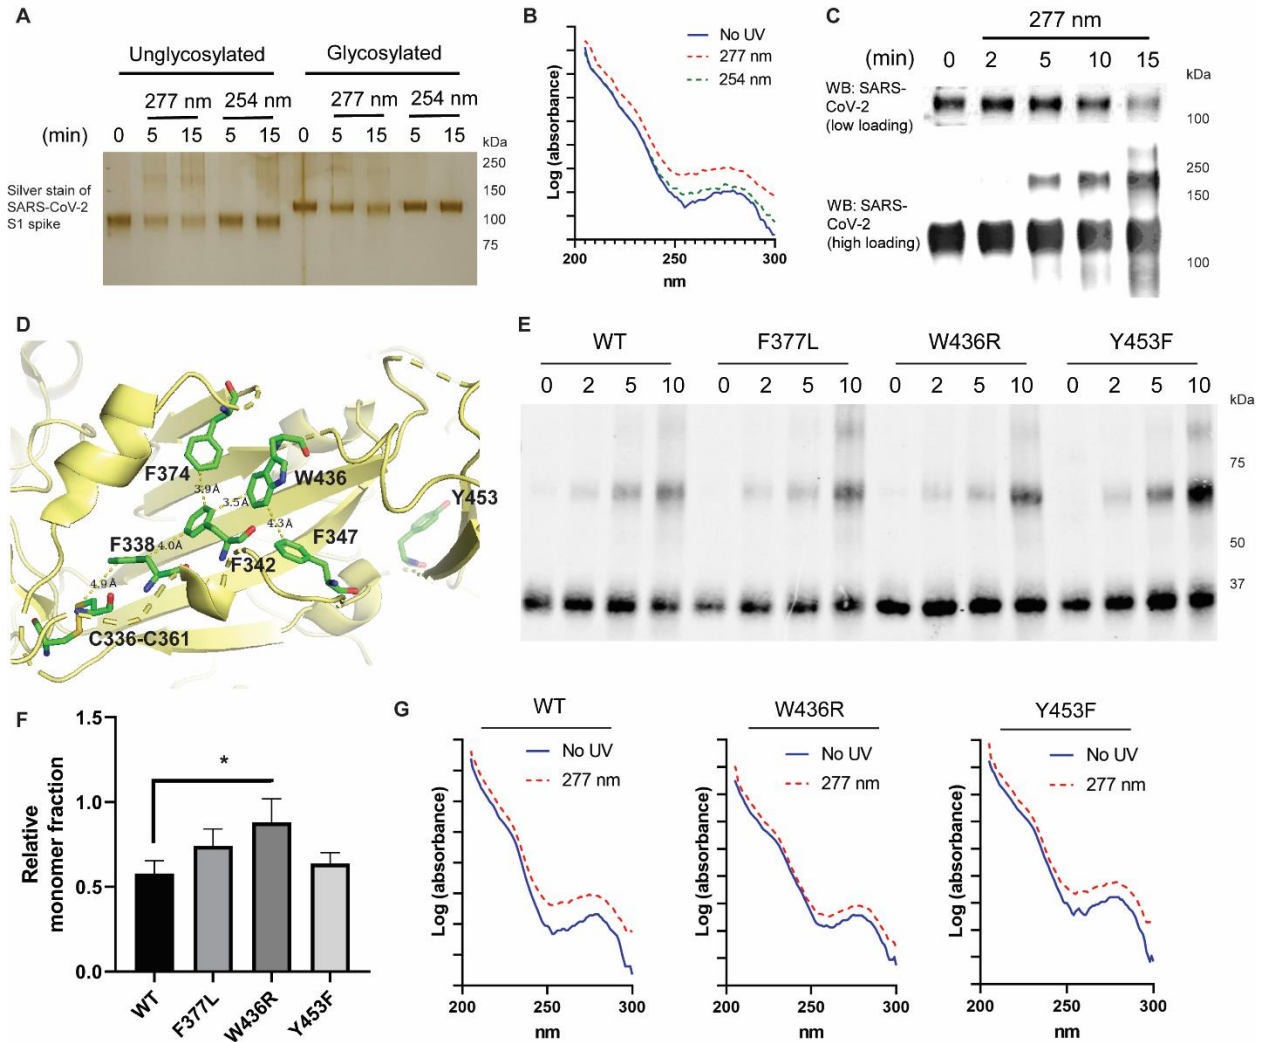

193

194 **Figure 4. Photodegradation of SARS-CoV-2 spike protein under 277nm UVC LED**

195 (a) Silver stains of un-glycosylated and glycosylated SARS-CoV-2 spike S1 protein under different  
196 UVC treatment.

197 (b) Changes in absorbance spectra of SARS-CoV-2 spike S1 observed after 15 minutes of 277-nm  
198 UVC LED irradiation but not 254-nm UVC lamp.

199 (c) Western blot analysis of SARS-CoV-2 spike S1 protein revealed that while the protein level of  
200 SARS-CoV-2 decreases under 277-nm UVC LED, higher aggregates could be observed upon  
201 higher UVC dose.

- 202 (d) SARS-CoV2 spike protein structure (PDB: 6VXX). Key residues centered around W436 that could  
203 potentially act as an antenna for 277nm UVC absorption. Y453 is depicted in the background while  
204 F377 is adjacent to F374 (not highlighted in the schematic).
- 205 (e) Western blot analysis of SARS-CoV-2 spike S1 RBD proteins revealed the differential rate of  
206 aggregation and degradation amongst the different mutants.
- 207 (f) Quantification of relative monomer fraction for wild type and mutant RBD proteins. The fraction is  
208 calculated as a function of (intensity at 35kDa) / (overall intensity across the whole lane).
- 209 (g) Absorbance spectra of the RBD proteins reveal little changes in 250-300 nm UVC absorbance for  
210 W436R compared to wild type and Y453F mutant, indicating potentially that W436R spike protein  
211 is less susceptible to 277nm UVC LED treatment.

212

213

214 **ASSOCIATED CONTENT**

215 **Supporting Information.** The following files are available free of charge.

216 **Figure S1.** Wavelength spectrum of different UVC light sources

217 **Figure S2.** Schematic diagram of UVC enclosure

218 **Table S1.** Two-way ANOVA results for hCoV-OC43 infectivity curves

219 **Table S2.** Two-way ANOVA results for hCoV-229e infectivity curves

220 **Author Contributions**

221 The manuscript was written through contributions of all authors. Here entails the list of contributions made  
222 by each author:- Conceptualization: QO, JWRT, WH; Methodology: QO, JWRT; Investigation: QO, JWRT,  
223 JDC, EW, WW; Funding acquisition: QO, JWRT; Writing – original draft: QO, WH; Writing – review &  
224 editing: JWRT, JDC, EW, WW. All authors have given approval to the final version of the manuscript.

225 **Funding Sources**

226 We would like to thank our funding sources:- National Research Foundation grant NRF2020NRF-CG002-  
227 035 (awarded to QO, JWRT) and Accelerate Technologies Gap-funded project GAP/2020/00392  
228 (awarded to JWRT, QO).

229 **ACKNOWLEDGMENT**

230 We thank Dr. Edward George Robins, Dr. Yaw-Sing Tan, Dr. Janarthanan Krishnamoorthy and Ms. Haitong  
231 Mao for proofreading of the manuscript; we thank Prof. Lisa Ng, Prof. Xianjun Loh, Dr. Yuanjie Liu, Ms.  
232 Siew Lan Lim and Dr. Sun-Yee Kim for providing technical advice and help.

233 **REFERENCES**

- 234 Barnard, I.R.M., Eadie, E., and Wood, K. (2020). Further evidence that far-UVC for disinfection is unlikely  
235 to cause erythema or pre-mutagenic DNA lesions in skin. *Photodermatol. Photoimmunol. Photomed.* 36,  
236 476–477.
- 237 Beaven, G.H., and Holiday, E.R. (1952). Ultraviolet Absorption Spectra of Proteins and Amino Acids. *Adv.*  
238 *Protein Chem.* 7, 319–386.

- 239 Beck, S.E., Ryu, H., Boczek, L.A., Cashdollar, J.L., Jeanis, K.M., Rosenblum, J.S., Lawal, O.R., and Linden,  
240 K.G. (2017). Evaluating UV-C LED disinfection performance and investigating potential dual-wavelength  
241 synergy. *Water Res.* 109, 207–216.
- 242 Beukers, R., Ylstra, J., and Berends, W. (2010). The effect of ultraviolet light on some components of the  
243 nucleic acids: II: In rapidly frozen solutions. *Recl. Des Trav. Chim. Des Pays-Bas* 77, 729–732.
- 244 Brown, I.H., and Johns, H.E. (1968). PHOTOCHEMISTRY OF URACIL. INTERSYSTEM CROSSING AND  
245 DIMERIZATION IN AQUEOUS SOLUTION. *Photochem. Photobiol.* 8, 273–286.
- 246 Buonanno, M., Welch, D., Shuryak, I., and Brenner, D.J. (2020). Far-UVC light (222 nm) efficiently and  
247 safely inactivates airborne human coronaviruses. *Sci. Rep.* 10, 1–8.
- 248 Chan, H.-L., Gaffney, P.R., Waterfield, M.D., Anderle, H., Peter Matthiessen, H., Schwarz, H.-P., Turecek,  
249 P.L., and Timms, J.F. (2006). Proteomic analysis of UVC irradiation-induced damage of plasma proteins:  
250 Serum amyloid P component as a major target of photolysis. *FEBS Lett.* 580, 3229–3236.
- 251 Fehr, A.R., and Perlman, S. (2015). Coronaviruses: An overview of their replication and pathogenesis. In  
252 *Coronaviruses: Methods and Protocols*, (Springer New York), pp. 1–23.
- 253 Gerchman, Y., Mamane, H., Friedman, N., and Mandelboim, M. (2020). UV-LED disinfection of  
254 Coronavirus: Wavelength effect. *J. Photochem. Photobiol. B Biol.* 212, 112044.
- 255 Inagaki, H., Saito, A., Sugiyama, H., Okabayashi, T., and Fujimoto, S. (2020). Rapid inactivation of SARS-  
256 CoV-2 with deep-UV LED irradiation. *Emerg. Microbes Infect.* 9, 1744–1747.
- 257 Kerwin, B.A., and Remmele, R.L. (2007). Protect from light: Photodegradation and protein biologics. *J.*  
258 *Pharm. Sci.* 96, 1468–1479.
- 259 Kim, D.K., and Kang, D.H. (2018). UVC LED irradiation effectively inactivates aerosolized viruses, bacteria,  
260 and fungi in a chamber-type air disinfection system. *Appl. Environ. Microbiol.* 84.
- 261 Kitagawa, H., Nomura, T., Nazmul, T., Omori, K., Shigemoto, N., Sakaguchi, T., and Ohge, H. (2020).  
262 Effectiveness of 222-nm ultraviolet light on disinfecting SARS-CoV-2 surface contamination. *Am. J. Infect.*  
263 *Control* 49, 299–301.
- 264 Lin, Q., Lim, J.Y.C., Xue, K., Yew, P.Y.M., Owh, C., Chee, P.L., and Loh, X.J. (2020). Sanitizing agents for  
265 virus inactivation and disinfection. *View* 1.
- 266 Merriam, V., and Gordon, M.P. (1967). PYRIMIDINE DIMER FORMATION IN ULTRAVIOLET  
267 IRRADIATED TMV-RNA. *Photochem. Photobiol.* 6, 309–319.
- 268 Nguyen, T.M.H., Suwan, P., Koottatep, T., and Beck, S.E. (2019). Application of a novel, continuous-

- 269 feeding ultraviolet light emitting diode (UV-LED) system to disinfect domestic wastewater for discharge or  
270 agricultural reuse. *Water Res.* *153*, 53–62.
- 271 Nunayon, S.S., Zhang, H., and Lai, A.C.K. (2020). Comparison of disinfection performance of UVC-LED  
272 and conventional upper-room UVGI systems. *Indoor Air* *30*, 180–191.
- 273 Raeiszadeh, M., and Adeli, B. (2020). A Critical Review on Ultraviolet Disinfection Systems against COVID-  
274 19 Outbreak: Applicability, Validation, and Safety Considerations. *ACS Photonics* *7*, 2941–2951.
- 275 Rauth, A.M. (1965). The Physical State of Viral Nucleic Acid and the Sensitivity of Viruses to Ultraviolet  
276 Light. *Biophys. J.* *5*, 257–273.
- 277 Sehgal, O.P. (1973). Inactivation of southern bean mosaic virus and its ribonucleic acid by nitrous acid and  
278 ultraviolet light. *J. Gen. Virol.* *18*, 1–10.
- 279 Setlow, R.B., and Carrier, W.L. (1966). Pyrimidine dimers in ultraviolet-irradiated DNA's. *J. Mol. Biol.* *17*,  
280 237–254.
- 281 Shang, J., Wan, Y., Luo, C., Ye, G., Geng, Q., Auerbach, A., and Li, F. (2020). Cell entry mechanisms of  
282 SARS-CoV-2. *Proc. Natl. Acad. Sci. U. S. A.* *117*, 11727–11734.
- 283 Song, K., Mohseni, M., and Taghipour, F. (2016). Application of ultraviolet light-emitting diodes (UV-LEDs)  
284 for water disinfection: A review. *Water Res.* *94*, 341–349.
- 285 Storm, N., McKay, L.G.A., Downs, S.N., Johnson, R.I., Birru, D., de Samber, M., Willaert, W., Cennini, G.,  
286 and Griffiths, A. (2020). Rapid and complete inactivation of SARS-CoV-2 by ultraviolet-C irradiation. *Sci.*  
287 *Rep.* *10*, 1–5.
- 288 Vijgen, L., Keyaerts, E., Moës, E., Maes, P., Duson, G., and Van Ranst, M. (2005). Development of one-  
289 step, real-time, quantitative reverse transcriptase PCR assays for absolute quantitation of human  
290 coronaviruses OC43 and 229E. *J. Clin. Microbiol.* *43*, 5452–5456.
- 291 Walls, A.C., Park, Y.J., Tortorici, M.A., Wall, A., McGuire, A.T., and Velesler, D. (2020). Structure, Function,  
292 and Antigenicity of the SARS-CoV-2 Spike Glycoprotein. *Cell* *181*, 281–292.e6.
- 293 Welch, D., Buonanno, M., Grilj, V., Shuryak, I., Crickmore, C., Bigelow, A.W., Randers-Pehrson, G.,  
294 Johnson, G.W., and Brenner, D.J. (2018a). Far-UVC light: A new tool to control the spread of airborne-  
295 mediated microbial diseases. *Sci. Rep.* *8*, 2752.
- 296 Welch, D., Spotnitz, H.M., Brenner, D.J., Randers-Pehrson, G., Buonanno, M., and Shuryak, I. (2018b).  
297 Far-UVC light applications: sterilization of MRSA on a surface and inactivation of aerosolized influenza  
298 virus. In *Light-Based Diagnosis and Treatment of Infectious Diseases*, T. Dai, ed. (SPIE), p. 60.



- 299 Werbin, H., Hidalgo-Salvatierra, O., Seear, J., and McLaren, A.D. (1966). Comparative photoreactivation  
300 of ultraviolet light-inactivated tobacco mosaic virus ribonucleic acid on *Chenopodium*, pinto bean, and  
301 tobacco plants. *Virology* 28, 202–207.
- 302 Woo, P.C.Y., Huang, Y., Lau, S.K.P., and Yuen, K.-Y. (2010). Coronavirus Genomics and Bioinformatics  
303 Analysis. *Viruses* 2, 1804–1820.
- 304 Wu, L.Z., Sheng, Y.B., Xie, J. Bin, and Wang, W. (2008). Photoexcitation of tryptophan groups induced  
305 reduction of disulfide bonds in hen egg white lysozyme. *J. Mol. Struct.* 882, 101–106.
- 306 Photochemistry and Photobiology of Nucleic Acids - 1st Edition.
- 307

308 **MATERIALS AND METHODS**

309 **KEY RESOURCES TABLE**

| REAGENT or RESOURCE                                                       | SOURCE                   | IDENTIFIER                                                                                |
|---------------------------------------------------------------------------|--------------------------|-------------------------------------------------------------------------------------------|
| <b>Antibodies</b>                                                         |                          |                                                                                           |
| Anti-Coronavirus OC43 Spike Protein antibody                              | Cusabio                  | CSB-PA336163EA01HIY                                                                       |
| SARS-CoV-2 Spike RBD antibody                                             | Sinobiological           | 40592-T62                                                                                 |
| <b>Bacterial and virus strains</b>                                        |                          |                                                                                           |
| HCoV-229E                                                                 | ATCC                     | VR-740                                                                                    |
| HCoV-OC43                                                                 | ATCC                     | VR-1588                                                                                   |
| <b>Chemicals, peptides, and recombinant proteins</b>                      |                          |                                                                                           |
| EMEM                                                                      | ATCC                     | 30-2003                                                                                   |
| RPMI-1640                                                                 | ATCC                     | 30-2011                                                                                   |
| Purified recombinant spike proteins                                       | Sinobiological           | 40592-V08H80,<br>40591-V08H3,<br>40592-V08H9,<br>40592-V08H27,<br>40591-V08H, 40607-V08H1 |
| Carboxymethylcellulose                                                    | Sigma Aldrich            | C4888                                                                                     |
| <b>Critical commercial assays</b>                                         |                          |                                                                                           |
| QiAmp Viral RNA mini kit                                                  | Qiagen                   |                                                                                           |
| TaqPath 1-step RT-qPCR master mix CG                                      | Applied Biosystems       |                                                                                           |
| Pierce™ Silver Stain Kit                                                  | Thermofisher             |                                                                                           |
| <b>Deposited data</b>                                                     |                          |                                                                                           |
| SARS-CoV-2 Spike Protein                                                  | PDB                      | 6VXX                                                                                      |
| hCoV-OC43                                                                 | NCBI Nucleotide database | MW532119.1                                                                                |
| hCoV-229e                                                                 | NCBI Nucleotide database | KU291448.1                                                                                |
| SARS-CoV-2                                                                | NCBI Nucleotide database | MW403500.1                                                                                |
| <b>Experimental models: Cell lines</b>                                    |                          |                                                                                           |
| MRC-5                                                                     | ATCC                     | CCL-171                                                                                   |
| HCT-8                                                                     | ATCC                     | CCL-244                                                                                   |
| <b>Oligonucleotides</b>                                                   |                          |                                                                                           |
| Forward Primer for qRT-PCR of HCoV-OC43: 5'-ATGTTAGGCCGATAATTGAGGACTAT-3' | Vjigen et al             |                                                                                           |
| Reverse Primer for qRT-PCR of HCoV-OC43: 5'-AATGTAAAGATGGCCGCGTATT-3'     | Vjigen et al             |                                                                                           |
| <b>Software and algorithms</b>                                            |                          |                                                                                           |
| ImageJ                                                                    | Schneider et al., 2012   | <a href="https://imagej.nih.gov/ij/">https://imagej.nih.gov/ij/</a>                       |
| GraphPad Prism Software 8.4.3                                             | GraphPad Inc.            |                                                                                           |
| Quantstudio 5 software                                                    | Applied Biosystems       |                                                                                           |
| <b>Other</b>                                                              |                          |                                                                                           |
| 222-nm far UVC lamp                                                       | Ushio                    | N.A.                                                                                      |
| 254-nm UVC mercury lamp                                                   | Sankyo Denki             | G8T5                                                                                      |

|                   |          |                |
|-------------------|----------|----------------|
| 277-nm UVC LED    | Lextar   | PU35CM1        |
| Spectroradiometer | GL Optic | GL Spectis 4.0 |

310

311 Viral strains and viral propagation

312 HCoV-229E (ATCC VR-740) and hCoV-OC43 (ATCC VR-1558) were propagated in human lung fibroblasts  
313 MRC-5 (ATCC CCL-171) and colon adenocarcinoma cells HCT-8 (ATCC CCL-244) respectively (all from  
314 ATCC, Manassas, VA). The MRC-5 fibroblasts were grown in EMEM (ATCC 30-2003) supplemented with  
315 10% Fetal Bovine Serum (FBS), 100 U/ml penicillin and 100 µg/ml streptomycin (Sigma-Aldrich, St. Louis,  
316 MO). The HCT-8 epithelial cells were cultured in RPMI-1640 supplemented with 10% horse serum, 100  
317 U/ml penicillin and 100 µg/ml streptomycin. The virus infection medium is made up of EMEM or RPMI-1640  
318 with 2% FBS or horse serum for hCoV-229E and hCoV-OC43 respectively.

319 UV sources and irradiance measurement

320 To understand the effect of UVC wavelength on human coronaviruses, three different UVC light sources –  
321 222-nm far UVC lamp (Ushio), 254-nm UVC mercury lamp (Sankyo Denki G8T5) and 277-nm UVC LED  
322 (Lextar PU35CM1) were used in this study. These UVC light sources were measured using a calibrated  
323 spectroradiometer (GL Spectis 4.0) with an absolute measurement uncertainty of less than 6%. To provide  
324 a comparative UVGI efficacy study between these UVC light sources, the radiant intensity of the far UVC  
325 and mercury lamp is measured at different distances while the UVC LEDs are driven at different constant  
326 drive currents to obtain a common UV intensity of 73 µW/cm<sup>2</sup>. The UVC LED, with a beam angle of 120°,  
327 is assembled into a 5 x 5 array at a working distance of 12 cm to ensure uniform UV intensity across the  
328 surface of the petri dish. The relative wavelength spectra of the light sources are shown in **Fig. S1**. Based  
329 on the UV intensity readings, an enclosure is fabricated for each light source and the radiant intensity of  
330 the enclosure is further validated with the spectroradiometer as shown in **Fig. S2**.

331 Viral infectivity experiments

332 The virus was propagated as previously described and stored in virus infection medium at 10<sup>8</sup> PFU/ml. For  
333 each irradiation, 100 µl of virus suspension was placed on a 3-cm petri dish. After each irradiation, the virus  
334 was subjected to serial dilution of 5 times, and 50 µl of each condition is diluted with 450 µl of virus infection

335 medium into 24-hour old and 80-90 % confluent MRC-5 or HCT-8 cells in 6-well plates. The cells were  
336 incubated with the virus for 1 hour in a humidified incubator with 5% CO<sub>2</sub> before addition of a liquid overlay  
337 medium, 3% carboxymethylcellulose, is applied to the cells to restrict virus growth to the originally infected  
338 loci of cells. The cells are incubated at 37C in a 5% CO<sub>2</sub> incubator for 3 days before the liquid overlay  
339 medium is aspirated and fixation with 4% paraformaldehyde is performed at room temperature for an hour.  
340 Staining with 0.5% crystal violet is then conducted and the plaques are then quantified.

#### 341 Immunofluorescence experiments

342 To assess whether 5 minutes of various UVC illumination reduces the number of infected cells,  
343 immunostaining was performed to detect the presence of OC43 viral particles in the host human cells.  
344 Briefly, 2 x 10<sup>5</sup> HCT-8 cells were plated in each petri dish one day before the experiment. The viral  
345 suspension after their respective treatments was overlaid on the monolayer of host cells. After one hour of  
346 incubation, the cells were washed with PBS and incubated for two days in fresh medium. The cells were  
347 then fixed with 4% paraformaldehyde at room temperature for 15 minutes and washed with PBS before  
348 being labelled with anti-Coronavirus OC43 Spike Protein antibody (CusaBio Technology LLC, Houston, TX,  
349 USA) 1:500 in PBS containing 2 % bovine serum albumin (BSA) and 0.1 % TBS-T. Cells were then washed  
350 with PBS and labelled with goat anti-rabbit Alexa Fluor-488 (Life Technologies, Grand Island, NY) in PBS  
351 containing 2 % BSA at room temperature for an hour with gentle shaking. Following washing with PBS, the  
352 cells were stained with DAPI and observed with the 40x objective of Nikon Ti-2 TIRF microscope.

#### 353 Reverse Transcriptase Experiments

354 Beta-coronavirus RNA was extracted from the viral samples on each petri dish using the QiAmp Viral RNA  
355 mini kit (Qiagen) following the manufacturer's instructions. 5 µl of each sample was used for qRT-PCR  
356 analysis utilizing the TaqPath 1-step RT-qPCR master mix CG (Applied Biosystems) and the primer set  
357 spanning a target region of 68bp for HCoV-OC43 as reported (20). The forward primer is 5'-  
358 ATGTTAGGCCGATAATTGAGGACTAT-3 and the reverse primer is 5'-AATGTAAAGATGGCCGCGTATT-  
359 3'. The analysis was then performed using the Quantstudio 5 software.

#### 360 Protein degradation experiments

361 The antibodies that were utilized for western blots in this paper includes anti-Coronavirus OC43 Spike  
362 Protein antibody (CusaBio Technology LLC, Houston, TX, USA) and SARS-CoV-2 Spike RBD antibody  
363 (SinoBiological). All coronavirus purified spike proteins were obtained from SinoBiological. All samples for  
364 western blot were lysed in 2x Lamelli buffer and incubated in room temperature for 20 minutes before  
365 loading. Approximately 200 ng of protein sample is loaded for silver staining experiments and 1ug of protein  
366 sample is loaded for western blot experiments. The lysates were then subjected to SDS gel electrophoresis.  
367 For silver staining, we utilized the Pierce™ Silver Stain Kit (Thermofisher). For western blot, the samples  
368 were transferred to nitrocellulose membranes using iBlot2 (Life Technologies), blocked with 5% BSA in  
369 TBST and incubated with primary antibodies in 5% BSA. Membranes were then incubated with rabbit-  
370 IRDye 800 CW secondary antibodies and imaged on an Odyssey CLx (LI-COR). Absorption spectroscopy  
371 was performed on Nanodrop (Thermofisher).

#### 372 Quantification and Statistical Analyses

373 The number of replicates (n) are indicated in the respective figure legends. For all statistical tests,  
374 significance was measured against  $p < 0.05$ . For comparisons of infectivity curves, 2-way analyses of  
375 variance (ANOVA) were carried out with the different UVC wavelengths and exposure time as the factors.  
376 All statistical analyses were performed with the GraphPad Prism Software 8.4.3 (GraphPad Software Inc.,  
377 La Jolla, CA, USA) and all values are expressed as means +/- standard deviation.

#### 378 Protein structure studies

379 The Desktop PyMOL 2.4 was used to visualize the protein structure of SARS-CoV-2 S glycoprotein (Protein  
380 Data Bank 6VXX) and calculate the distances between each indicated residue.

381

382

383

384
